# Supplementary material for: Feeding Habit-Specific Heavy Metal Bioaccumulation and Health Risk Assessment of Fish in a Tropical Reservoir in Southern China
Source: MDPI journal article supplement (doi:10.3390/fishes8040211), 2023-04-18
Supplement: s1 [file s1]

*Supplementary Materials*

# Feeding Habit-Specific Heavy Metal Bioaccumulation and Health Risk Assessment of Fish in a Tropical Reservoir in Southern China

Di Wu <sup>1</sup>, Hao Feng <sup>1</sup>, Ying Zou <sup>1</sup>, Juan Xiao <sup>1</sup>, Pengfei Zhang <sup>1</sup>, Yuxiang Ji <sup>2</sup>, Sovan Lek <sup>1,3</sup>, Zhiqiang Guo <sup>1,\*</sup> and Qiongyao Fu <sup>2,\*</sup>

<sup>1</sup> School of Life Sciences, State Key Laboratory of Marine Resource Utilization in South China Sea, Key Laboratory of Tropical Biological Resources of Ministry of Education, Hainan University, Haikou 570228, China

<sup>2</sup> Key Laboratory of Tropical Translational Medicine of Ministry of Education, NHC Key Laboratory of Control of Tropical Diseases, School of Tropical Medicine, Hainan Medical University, Haikou 571199, China

<sup>3</sup> Laboratoire Evolution & Diversité Biologique, Université Paul Sabatier, 118 route de Narbonne, Toulouse cedex 4 31062, France

\* Correspondence: guozq@hainanu.edu.cn (Z.G.), fuqiongyaoabc@163.com (Q.F.)

## Contents of Supporting Information

|                                                                                      |           |
|--------------------------------------------------------------------------------------|-----------|
| Table for sampling information                                                       | Table S1  |
| Table for the heavy metal contents of water at each sampling site in every season    | Table S2  |
| Table for the heavy metal contents of sediment at each sampling site in every season | Table S3  |
| Figure for ANOSIM results                                                            | Figure S1 |

**Table S1.** The detailed information of fish sampled in this study.

| Scientific name                       | Sites<br>(N <sup>a</sup> )                     | Length<br>(mm) | Weight<br>(g) | Feeding habit <sup>b</sup> | Habitat <sup>b</sup> | Percentage of<br>water |
|---------------------------------------|------------------------------------------------|----------------|---------------|----------------------------|----------------------|------------------------|
| <i>Xenocypris davidi</i>              | S1(1),<br>S6(1)                                | 138±1.41       | 31.6±5.03     | Omnivore                   | Benthopelagic        | 82.24%                 |
| <i>Osteochilus<br/>salsburyi</i>      | S1(1), S5(1),<br>S8(1)                         | 118±14.79      | 33.2±8.76     | Omnivore                   | Benthopelagic        | 82.13%                 |
| <i>Oreochromis<br/>niloticus</i>      | S3(2), S4(1),<br>S5(1), S8(2)                  | 113.7±17.8     | 64.6±28.43    | Omnivore                   | Benthopelagic        | 80.18%                 |
| <i>Opsariichthys<br/>bidens</i>       | S2(2), S3(2),<br>S9(1)                         | 119±15.65      | 27±8.53       | Carnivore                  | Benthopelagic        | 79.51%                 |
| <i>Carassius auratus</i>              | S1(1), S3(1),<br>S5(1), S6(1),<br>S7(1), S8(1) | 112±21         | 47.5±21.89    | Omnivore                   | Benthopelagic        | 80.89%                 |
| <i>Aristichthys nobilis</i>           | S5(1), S6(1),<br>S9(1)                         | 160.3±32.02    | 77.8±60.11    | Omnivore                   | Pelagic              | 82.63%                 |
| <i>Culter alburnus</i>                | S4(1), S8(1),<br>S9(2)                         | 158.3±77.17    | 73±106.96     | Omnivore                   | Benthopelagic        | 82.97%                 |
| <i>Cirrhinus<br/>molitorella</i>      | S3(2), S5(3)                                   | 202±13.06      | 172±45.99     | Omnivore                   | Benthopelagic        | 80.22%                 |
| <i>Channa argus</i>                   | S4(1), S6(2)                                   | 257.3±59       | 294.8±178.73  | Carnivore                  | Benthopelagic        | 80.72%                 |
| <i>Pseudohemiculter<br/>dispar</i>    | S1(1), S2(1),<br>S4(2), S7(2)                  | 146.8±16.88    | 32.2±15.48    | Omnivore                   | Benthopelagic        | 78.73%                 |
| <i>Oxyeleotris<br/>marmorata</i>      | S1(1), S3(1),<br>S5(1), S6(1),<br>S7(1), S8(1) | 172±28.32      | 126.7±52.32   | Carnivore                  | Demersal             | 81.68%                 |
| <i>Claris fuscus</i>                  | S3(1), S5(1),<br>S6(1)                         | 284.8±12.04    | 340.6±19.74   | Omnivore                   | Demersal             | 81.38%                 |
| <i>Misgurnus<br/>anguillicaudatus</i> | S2(2), S5(2),<br>S7(2)                         | 191.9±5.87     | 88±11.56      | Omnivore                   | Demersal             | 77.59%                 |

<sup>a</sup> The number of fish collected at the sampling site. <sup>b</sup> Froese and Pauly (2017).

**Table S2.** The heavy metal contents of water at each sampling site in every season.

| Time      | Site | Cr    | Mn      | Fe     | Ni    | Cu    | Zn     | Cd    | Pb    |
|-----------|------|-------|---------|--------|-------|-------|--------|-------|-------|
| March     | S1   | 0.164 | 3.725   | 31.862 | 0.000 | 0.353 | 5.518  | 0.006 | 0.590 |
|           | S2   | 0.110 | 2.724   | 27.632 | 0.000 | 0.264 | 0.506  | 0.009 | 0.239 |
|           | S4   | 0.140 | 3.294   | 28.663 | 0.000 | 0.446 | 8.889  | 0.003 | 0.776 |
|           | S5   | 0.231 | 9.069   | 52.228 | 0.000 | 0.755 | 11.464 | 0.022 | 1.283 |
|           | S6   | 0.104 | 5.721   | 30.106 | 0.000 | 0.266 | 12.000 | 0.003 | 0.865 |
|           | S7   | 0.091 | 4.250   | 33.539 | 0.000 | 0.239 | 7.358  | 0.005 | 0.496 |
|           | S3   | 0.484 | 3.917   | 40.826 | 0.000 | 0.360 | 12.253 | 0.004 | 1.814 |
|           | S8   | 0.266 | 7.085   | 49.428 | 0.000 | 0.632 | 14.488 | 0.006 | 1.170 |
|           | S9   | 0.122 | 17.399  | 83.928 | 0.000 | 0.428 | 7.776  | 0.006 | 1.017 |
| June      | S1   | 0.289 | 6.558   | 16.409 | 1.307 | 0.472 | 5.196  | 0.006 | 0.25  |
|           | S2   | 0.393 | 6.666   | 28.549 | 1.504 | 0.589 | 7.315  | 0.023 | 1.491 |
|           | S4   | 0.56  | 6.652   | 19.839 | 1.308 | 0.495 | 7.261  | 0.005 | 0.575 |
|           | S5   | 1.683 | 9.055   | 52.061 | 2.229 | 2.424 | 15.19  | 0.016 | 3.126 |
|           | S6   | 1.105 | 11.328  | 29.435 | 1.463 | 0.987 | 7.197  | 0.011 | 2.451 |
|           | S7   | 1.445 | 11.069  | 36.369 | 1.441 | 0.709 | 9.236  | 0.01  | 3.232 |
|           | S3   | 0.815 | 5.078   | 30.039 | 1.869 | 1.339 | 13.171 | 0.01  | 1.068 |
|           | S8   | 0.437 | 9.271   | 77.163 | 1.744 | 0.955 | 5.815  | 0.008 | 0.726 |
|           | S9   | 0.475 | 21.277  | 86.453 | 1.712 | 0.851 | 7.511  | 0.009 | 0.732 |
| September | S1   | 0.021 | 7.792   | 20.679 | 0.000 | 0.189 | 0.788  | 0.002 | 0.000 |
|           | S2   | 0.043 | 6.397   | 21.801 | 0.000 | 0.178 | 1.439  | 0.007 | 0.000 |
|           | S4   | 0.027 | 5.419   | 18.830 | 0.000 | 0.179 | 0.000  | 0.000 | 0.000 |
|           | S5   | 0.021 | 3.151   | 11.422 | 0.000 | 0.178 | 0.000  | 0.000 | 0.000 |
|           | S6   | 0.012 | 6.013   | 14.995 | 0.000 | 0.155 | 0.000  | 0.002 | 0.000 |
|           | S7   | 0.068 | 7.758   | 32.277 | 0.162 | 1.523 | 8.587  | 0.013 | 0.185 |
|           | S3   | 0.028 | 7.603   | 27.129 | 0.000 | 0.303 | 1.292  | 0.003 | 0.000 |
|           | S8   | 0.027 | 17.474  | 64.225 | 0.000 | 0.285 | 0.000  | 0.004 | 0.000 |
|           | S9   | 0.033 | 15.057  | 52.101 | 0.000 | 0.319 | 0.667  | 0.006 | 0.084 |
| December  | S1   | 0.069 | 56.402  | 34.759 | 0.367 | 0.000 | 15.356 | 0.003 | 0.000 |
|           | S2   | 0.106 | 107.350 | 64.366 | 0.348 | 0.000 | 10.753 | 0.018 | 0.081 |
|           | S4   | 0.005 | 119.208 | 48.291 | 0.306 | 0.000 | 11.691 | 0.001 | 0.024 |
|           | S5   | 0.033 | 197.475 | 30.436 | 0.260 | 0.000 | 7.505  | 0.001 | 0.000 |
|           | S6   | 0.059 | 41.944  | 15.780 | 0.211 | 0.000 | 21.510 | 0.001 | 0.000 |
|           | S7   | 0.019 | 31.940  | 24.067 | 0.221 | 0.000 | 6.902  | 0.002 | 0.028 |
|           | S3   | 0.000 | 126.595 | 21.249 | 0.226 | 0.000 | 4.330  | 0.001 | 0.000 |
|           | S8   | 0.033 | 5.203   | 20.524 | 0.316 | 0.000 | 8.236  | 0.002 | 0.010 |
|           | S9   | 0.072 | 19.252  | 59.022 | 0.478 | 0.000 | 23.786 | 0.004 | 0.030 |

**Table S3.** The heavy metal contents of sediment at each sampling site in every season.

| Time      | Site | Cr      | Mn      | Fe        | Ni      | Cu      | Zn      | Cd    | Pb      |
|-----------|------|---------|---------|-----------|---------|---------|---------|-------|---------|
| March     | S1   | 31.132  | 345.780 | 33026.124 | 150.910 | 21.416  | 51.389  | 0.118 | 32.473  |
|           | S2   | 10.492  | 63.445  | 5066.277  | 19.615  | 7.771   | 4.698   | 0.051 | 5.036   |
|           | S4   | 112.891 | 390.425 | 21633.663 | 126.655 | 23.672  | 31.591  | 0.159 | 10.014  |
|           | S5   | 57.602  | 483.426 | 18100.771 | 88.457  | 30.595  | 18.682  | 0.142 | 17.835  |
|           | S6   | 66.995  | 749.480 | 20737.848 | 116.469 | 25.811  | 36.784  | 0.256 | 20.978  |
|           | S7   | 11.531  | 315.882 | 19119.131 | 77.308  | 31.547  | 23.449  | 0.300 | 31.932  |
|           | S3   | 49.304  | 246.051 | 17798.181 | 85.139  | 23.689  | 31.037  | 0.113 | 16.465  |
|           | S8   | 39.475  | 224.624 | 13105.861 | 60.431  | 30.935  | 27.322  | 0.161 | 23.080  |
|           | S9   | 83.256  | 191.114 | 29949.498 | 144.726 | 48.535  | 36.650  | 0.178 | 22.912  |
| June      | S1   | 43.017  | 197.385 | 28208.617 | 129.384 | 16.304  | 52.861  | 0.158 | 27.478  |
|           | S2   | 44.367  | 127.940 | 19566.775 | 92.189  | 24.852  | 22.516  | 0.125 | 13.226  |
|           | S4   | 60.381  | 113.461 | 13784.453 | 68.364  | 33.303  | 19.280  | 0.125 | 9.777   |
|           | S5   | 9.477   | 197.841 | 6160.625  | 26.964  | 7.678   | 9.829   | 0.138 | 15.791  |
|           | S6   | 10.224  | 268.266 | 5913.029  | 23.397  | 14.118  | 7.245   | 0.104 | 23.600  |
|           | S7   | 8.992   | 181.376 | 17931.461 | 72.679  | 14.312  | 28.206  | 0.313 | 32.642  |
|           | S3   | 34.807  | 308.308 | 29251.720 | 123.084 | 24.512  | 23.137  | 0.177 | 22.602  |
|           | S8   | 57.448  | 169.743 | 18436.121 | 90.959  | 28.476  | 24.712  | 0.137 | 45.141  |
|           | S9   | 27.501  | 179.821 | 16696.382 | 72.214  | 21.028  | 31.020  | 0.189 | 20.174  |
| September | S1   | 59.228  | 404.195 | 9289.946  | 61.395  | 18.262  | 160.335 | 1.997 | 45.417  |
|           | S2   | 66.889  | 112.508 | 3054.219  | 30.126  | 8.408   | 44.874  | 0.377 | 12.695  |
|           | S4   | 17.239  | 118.193 | 3591.799  | 23.120  | 5.576   | 61.902  | 0.573 | 50.914  |
|           | S5   | 122.606 | 283.334 | 39123.352 | 188.260 | 33.425  | 110.785 | 2.334 | 16.797  |
|           | S6   | 36.983  | 303.968 | 2112.273  | 38.677  | 18.363  | 75.295  | 2.086 | 74.872  |
|           | S7   | 26.407  | 168.421 | 1710.322  | 52.295  | 20.919  | 89.912  | 1.740 | 112.523 |
|           | S3   | 62.811  | 235.977 | 3685.128  | 29.467  | 8.712   | 84.175  | 1.781 | 102.325 |
|           | S8   | 19.113  | 354.883 | 9954.651  | 58.135  | 13.205  | 88.634  | 1.576 | 62.865  |
|           | S9   | 39.253  | 475.868 | 13005.051 | 70.069  | 6.739   | 91.770  | 1.478 | 73.272  |
| December  | S1   | 56.708  | 353.198 | 17354.582 | 97.493  | 53.654  | 116.689 | 2.682 | 85.646  |
|           | S2   | 52.802  | 191.245 | 6624.050  | 68.064  | 48.321  | 90.446  | 2.205 | 11.449  |
|           | S4   | 146.739 | 216.487 | 13886.164 | 87.653  | 66.009  | 105.234 | 2.208 | 112.245 |
|           | S5   | 145.650 | 163.432 | 16020.261 | 88.738  | 40.272  | 86.304  | 1.654 | 54.035  |
|           | S6   | 52.759  | 303.290 | 8381.088  | 68.626  | 29.541  | 78.102  | 2.124 | 106.708 |
|           | S7   | 62.901  | 237.998 | 16506.466 | 62.495  | 40.793  | 90.219  | 1.655 | 49.259  |
|           | S3   | 43.911  | 114.454 | 7234.171  | 52.065  | 373.807 | 164.806 | 1.404 | 6.941   |
|           | S8   | 37.801  | 216.901 | 7361.763  | 49.427  | 62.439  | 102.434 | 2.011 | 27.810  |
|           | S9   | 53.495  | 182.549 | 16905.498 | 85.538  | 44.406  | 114.349 | 2.285 | 33.209  |

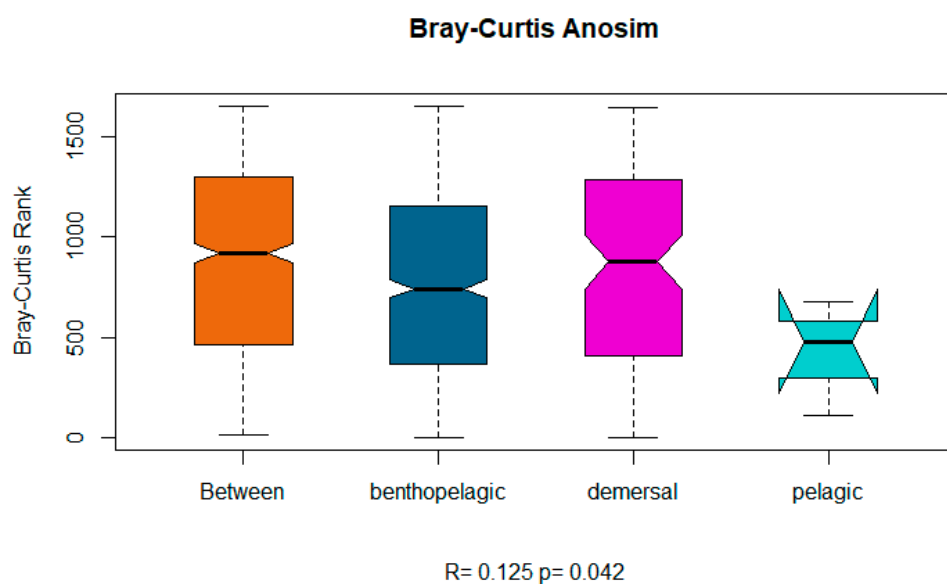

**Figure S1.** ANOSIM result of fish with different living habitats (pelagic, benthopelagic and demersal).
